# Supplementary material for: Parental digital health information seeking behavior in Switzerland: a cross-sectional study
Source: BMC Public Health. 2019 Feb 21;19:225. doi: 10.1186/s12889-019-6524-8 (PMC6385444; doi:10.1186/s12889-019-6524-8)
Supplement: Supplementary file 1 — Questionnaire. (XLSX 21 kb) [file 12889_2019_6524_MOESM1_ESM.xlsx]

## Sheet: Tabelle1
Questionnaire translation: german-english
Question Nr.	German version	English version	Answer options
(1) Socio-demographic information about the survey participant
1.1	Wer beantwortet diesen Fragebogen?	Who fills in this questionnaire?	mother; father; partner of the mother; partner of the father; other
1.2	Wann sind Sie geboren?	When where you born?	(year)
1.3	Welche Schule oder Ausbildungsstätte haben Sie zuletzt besucht?	What is the last educational institution you attended?	Compulsory schooling only; secondary education; tertiary education; no school leaving certificate
1.4	Welche Nationalität haben Sie?	What is your nationality?	Swiss; Non-swiss; double nationality (Swiss, Other)
1.5	Bei wem lebt Ihr jüngstes Kind hauptsächlich?	With whom does you youngest child live with mostly?	Biological parents; mother and partner; father and partner; mother; father; other
8.1	Wie viele Erwachsene wohnen insgesamt in Ihrem Haushalt?	How many adults live in your household?	(number)
8.2	Wie viele Kinder unter 15 Jahren wohnen in Ihrem Haushalt einschliesslich Ihr jüngstes Kind?	How many children under 15 years live in your household (youngest child included)?	(number)
8.3	Bitte geben Sie das Alter der anderen Kinder unter 15 Jahren in Ihrem Haushalt an (ohne Ihr jüngstes Kind):	Please state the age of the other children under 15 years living in your household (youngest child excluded)	second youngest:_____ third youngest: _____ fourth youngest: _____ etc.
8.4	Wie hoch ist ungefähr das gesamte monatliche Nettoeinkommen von Ihrem Haushalt?	How high is your houshold income (after tax deduction) approximately?	Less than 4'500 CHF a month; between 4'500 and 6'000CHF a month; between 6'000 and 9'000CHF a month; more than 9'000CHF a month; no indication/ don't know
(2) Socio-demographic information about the youngest child
2.1	Bitte geben Sie das Alter Ihres Kindes an	How old is your child?	(months)
2.2	Bitte geben Sie das Geschlecht Ihres Kindes an	What is the sex of your child?	female; male
2.3	In welcher Schwangerschaftswoche wurde Ihr Kind geboren?	In which gestational week was your child born?	(week of pregnancy)
2.4	Wie schwer war Ihr Kind bei der Geburt?	How much did your child weigh at birth?	(gram)
2.5	Es wird empfohlen, Kinder regelmässig bei der Kinderärztin oder dem Kinderarzt vorsorglich untersuchen zu lassen. Haben Sie die empfohlenen Vorsorgeuntersuchungen bis jetzt wahrgenommen?	It ist recommended to see your pediatrician regularly for preventive pediatric check-ups. Have you follwed teh recommendations until now?	no; yes; yes, but not at recommended times; partly
2.6	Wenn Sie unter 2.5 mit „Ja“, „Ja, aber…“ oder „Teileweise“ geantwortet haben: Welche Vorsorgeuntersuchungen beim Kinderarzt/bei der Kinderärztin haben Sie für Ihr Kind in Anspruch genommen?	If you answered "Yes", "Yes, but.." or "Partly" please answer the follwoing questions: Which preventive pediatric check-ups did you attend?	1-month, 2-month, 4-month, 6-month, 9-12 month, 24-month
2.7	Welche Person in Ihrem Haushalt begleitet das Kind am häufigsten zu den Vorsorgeuntersuchungen?	Which person in your household accompagnies your child the most to preventive pediatric visits .	mother; father; partner of the mother; partner of the father; other
2.8	In den ersten zwei Lebensjahren wird in der Schweiz empfohlen, Kinder mit 2, 4, 6, 12 oder 15-24 Monaten zu impfen. Haben Sie die empfohlenen Impfungen durchführen lassen?	In the frist 2 years, it is recommended in Switzerland to vaccine children at 2, 4, 6. 12, 15-24 months. Have you had your child vaccinated as recommended?	no; yes; yes, but not at recommended times; partly, I refused the following vaccinations; I don't know
2.9	Wie würden Sie den Gesundheitszustand Ihres Kindes im Allgemeinen beschreiben?	How would you evaluate your child's health?	Very good; good; moderate; bad; very bad
2.1	Hat Ihr Kind eine angeborene Einschränkung der Gesundheit?	Does your child have a congenital health condition?	Yes, a physical limitation of health (e.g. due to malformations); Yes, a developmental delay; Yes, a hearing or visual impairment; Yes, it has congenital health condition, namely:____; no, my child does not have a congenital health condition
2.11	Benötigt oder nimmt Ihr Kind vom Arzt verschriebene Medikamente (ausser Vitamine)?	Does your child need or take any medication prescribed by your doctor?	Yes; no
2.12	Wenn „Ja“, geschieht dies auf Grund einer Krankheit oder eines gesundheitlichen Problems?	If "Yes", due to a disease or health problem?	Yes; no
2.13	Wenn „Ja“, um welche Krankheit oder welches gesundheitliches Problem handelt es sich?	If "Yes", for which disease or health problem ?
2.14	Dauert dieses Problem bereits 12 Monate an oder ist eine Dauer von 12 Monaten zu erwarten?	Does this disease or health condition last 12 months already, or is expected to last at least 12 months?	Yes; no
2.15	Braucht Ihr Kind mehr medizinische Versorgung, psychosoziale oder pädagogische Unterstützung, als es für Kinder in diesem Alter üblich ist?	Does your child need more medical care, psychosocial or pedagoical support than other children of the same age?	Yes; no
2.16	Wenn „Ja“, geschieht dies auf Grund einer Krankheit oder eines gesundheitlichen Problems?	If "Yes", due to a disease or health problem?	Yes; no
2.17	Wenn „Ja“, um welche Krankheit oder welches gesundheitliches Problem handelt es sich?	If "Yes", for which disease or health problem?
2.18	Dauert dieses Problem bereits 12 Monate an oder ist eine Dauer von 12 Monaten zu erwarten?	Does this disease or health condition last 12 months already, or is expected to last at least 12 months?	Yes; no
(3) digital media use with regard to child’s health and development
3.1	Wie häufig greifen Sie auf eigene Erfahrungen (z.B. Erfahrungen mit einem älteren Kind) zurück, wenn es um Kindergesundheit und Kinderentwicklung geht?	How often do you refer to own personal experiences (e.g to an older child) when you have questions regarding general child health and development?	Never; rarely; sometimes; frequently; very frequently
3.2	Wie häufig tauschen Sie sich mit folgenden Personen aus, wenn Sie allgemeine Fragen zu Kindergesundheit und Kinderentwicklung haben?	How often do you exchange with the follwoing persons, when you have questions regarding general child health and development?
		Pediatrician	Never; rarely; sometimes; frequently; very frequently
		Other health professionals	Never; rarely; sometimes; frequently; very frequently
		Telephone consultation of a children's emergency service or hospital	Never; rarely; sometimes; frequently; very frequently
		Telephone consultation of health insurance	Never; rarely; sometimes; frequently; very frequently
		Family members	Never; rarely; sometimes; frequently; very frequently
		Friends, neighbor, acquaintances	Never; rarely; sometimes; frequently; very frequently
3.3	Wie häufig benutzen Sie folgende Printmedien, wenn Sie allgemeine Fragen zu Kindergesundheit und Kinderentwicklung haben?	How often do you use the follwoing print media, when you have questions regarding general child health and development?
		Books	Never; rarely; sometimes; frequently; very frequently
		Magazines	Never; rarely; sometimes; frequently; very frequently
		Newspapers	Never; rarely; sometimes; frequently; very frequently
		Other print media	Never; rarely; sometimes; frequently; very frequently
3.4	Benutzen Sie digitale Medien (Internet, Apps, Social Media), wenn Sie allgemeine Fragen zur Kindergesundheit und -entwicklung haben?	Do you use digital media, when you have questions regarding general child health and development?	Yes; no
3.5	Wie häufig benutzen Sie folgende digitale Medien, wenn Sie allgemeine Fragen zu Kindergesundheit und Kinderentwicklung haben?	How often do you use digital media, when you have questions regarding general child health and development?
		Social media	Never; rarely; sometimes; frequently; very frequently
		Webpages for parents	Never; rarely; sometimes; frequently; very frequently
		Apps	Never; rarely; sometimes; frequently; very frequently
		Search engines	Never; rarely; sometimes; frequently; very frequently
		Webpages of pediatricians or children's hospitals	Never; rarely; sometimes; frequently; very frequently
		Official webpages of health services or health organizations	Never; rarely; sometimes; frequently; very frequently
		Other information sources, namely:___	Never; rarely; sometimes; frequently; very frequently
3.6	Wenn Sie Internetseiten für Mütter/Väter/Eltern verwenden: Welche Internetseite(n) für Mütter/ Väter/ Eltern verwenden Sie, wenn Sie allgemeine Fragen zu Kindergesundheit und Kinderentwicklung haben?	When you use Internet sites for mothers/fathers/parents: Which Internet sites do you use in general, when you have questions regarding general child health and development?	Multiple answer possible swissmom.ch /Eltern.de/ letsfamiliy.ch/ gofeminin.de/ familienleben.ch/ rund-ums-baby.de/ wireltern.ch/ windeln.de/ netmoms.de/ liliput-lounge.de/ babycenter.de/ hallo-eltern.de/ urbia.de / baby-und-familie.de/ familie.de/ Other webpages for parents, namely:___/ I don't know how the webpages I use are called
3.7	Falls Sie Apps nutzen, welche App(s) benutzen Sie, wenn Sie allgemeine Fragen zu Kindergesundheit und Kinderentwicklung haben?	If you use "Apps" which apps do you use when you have questions regarding general child health and development?	1. I use the following app: ___ 2. I use the following app: ___ 3. I use the following app: ___
3.8	Falls Sie Social Media Plattformen nutzen: Auf welchen Social Media Plattformen informieren Sie sich und wie oft nutzen Sie diese Plattformen, wenn es um Kindergesundheit und Kinderentwicklung geht?	If you use social media plattforms which social media do you use when you have questions regarding general child health and development?
		Facebook	Never; rarely; sometimes; frequently; very frequently
		Instagram	Never; rarely; sometimes; frequently; very frequently
		Twitter	Never; rarely; sometimes; frequently; very frequently
		YouTube	Never; rarely; sometimes; frequently; very frequently
		Pinterest	Never; rarely; sometimes; frequently; very frequently
		Professional social netwroks (e.g LinedIn)	Never; rarely; sometimes; frequently; very frequently
		Other social media platforms, namely:___	Never; rarely; sometimes; frequently; very frequently
3.9	Wie verwenden Sie in den digitalen Medien die Option der Chats, Posts oder Foren, wenn es um Kindergesundheit und Kinderentwicklung geht?	How do you use digital media options like chats, posts or foums when you have questions regarding general child health and development?	Multiple answer possible I read chats, posts, or forums inputs of other people / I ask questions in chats, posts, or forums / I post own experiences and opinions in chats, posts, or forums/ I answer question of other parents/ I do not use chats, posts, or forums
3.1	Wie häufig informieren Sie sich in den digitalen Medien (Internet, Apps, Social Media) über die folgenden Themen in Bezug auf Kindergesundheit und Kinderentwicklung?	How often do you use digital media to inform yourself on the following topics regarding general child health and development?
	Kindergesundheit allgemein	General child health	Never; rarely; sometimes; frequently; very frequently
	Kinderentwicklung allgemein	General child development	Never; rarely; sometimes; frequently; very frequently
	Regulationsstörung (z.B. Schlaf- oder Schreiverhalten, Koliken etc.)	Regulation and bonding disorders (Crying, sleeping, colics etc.)	Never; rarely; sometimes; frequently; very frequently
	Vorsorgeuntersuchungen	Preventive check-ups	Never; rarely; sometimes; frequently; very frequently
	Impfungen	Vaccinations	Never; rarely; sometimes; frequently; very frequently
	Therapie/Behandlungen	Therapy	Never; rarely; sometimes; frequently; very frequently
	Unklare gesundheitliche Probleme	Unclear health problems	Never; rarely; sometimes; frequently; very frequently
	Ernährung	Nutrition	Never; rarely; sometimes; frequently; very frequently
	Anderes Thema und zwar:	Other topic:_______	Never; rarely; sometimes; frequently; very frequently
3.11	Ich nutze digitale Medien (Internet, Apps, Social Media), wenn ich allgemeine Fragen zu Kindergesundheit und Kinderentwicklung habe, weil….	I use digital media (Internet, apps, social media) when I have questions regarding general child health and development for the following reasons:
		24h availability of information	Applies very much; applies; half/half; partly applies; does not apply
		Infromation up-to-date	Applies very much; applies; half/half; partly applies; does not apply
		Anonimity	Applies very much; applies; half/half; partly applies; does not apply
		Good personal experiences	Applies very much; applies; half/half; partly applies; does not apply
		Family or friends also use it	Applies very much; applies; half/half; partly applies; does not apply
		Allow to exchange opinions and experiences with other parents	Applies very much; applies; half/half; partly applies; does not apply
		Emotional support	Applies very much; applies; half/half; partly applies; does not apply
		Other reasons, namely:___	Applies very much; applies; half/half; partly applies; does not apply
3.12	Sie haben unter 3.4 „Nein“ geantwortet. Aus welchen Gründen benutzen Sie keine digitalen Medien, wenn Sie allgemeine Fragen zu Kindergesundheit und Kinderentwicklung haben?	Under 3.4 you answered "no". Why do you not use digital media when you have questions regarding general child health and development?	Multiple answer possible No Internet access/ I do not know where/how to search/ I do not know which information is reliabl/ The information found is confusing/difficult to understand/ It is difficult to find clear information/ Other reasons, namely:____
(4) digital media use with regard to child’s acute health problems
4.1	Wie häufig greifen Sie auf eigene Erfahrungen zurück (z.B. mit einem älteren Kind), wenn Ihr jüngstes Kind krank ist?	How often do you refer to own personal experiences (e.g to an older child) when your child is sick?	Never; rarely; sometimes; frequently; very frequently
4.2	Wie häufig kontaktieren Sie folgende Personen, wenn Ihr Kind krank ist und Sie Fragen haben?	How often do you exchange with the follwoing persons, when your child is sick?
		Pediatrician	Never; rarely; sometimes; frequently; very frequently
		Other health professionals	Never; rarely; sometimes; frequently; very frequently
		Telephone consultation of a children's emergency service or hospital	Never; rarely; sometimes; frequently; very frequently
		Telephone consultation of health insurance	Never; rarely; sometimes; frequently; very frequently
		Family members	Never; rarely; sometimes; frequently; very frequently
		Friends, neighbor, acquaintances	Never; rarely; sometimes; frequently; very frequently
4.3	Wie häufig benutzen Sie Printmedien, um sich zu informieren, wenn Ihr Kind krank ist?	How often do you use the follwoing print media, when your child is sick?
		Books	Never; rarely; sometimes; frequently; very frequently
		Magazines	Never; rarely; sometimes; frequently; very frequently
		Newspapers	Never; rarely; sometimes; frequently; very frequently
		Other print media	Never; rarely; sometimes; frequently; very frequently
4.4	Benutzen Sie digitale Medien (Internet, Apps, Social Media), wenn Ihr Kind krank ist und Sie Fragen haben?	Do you use digital media, when your child is sick?	Yes; no
4.5	Sie haben die Frage 4.4 mit „Nein“ beantwortet. Aus welchen Gründen benutzen Sie keine digitalen Medien, wenn Ihr Kind krank ist und Sie Fragen haben?	Under 4.4 you answered "no". Why do you not use digital media when you have questions regarding general child health and development?	Multiple answer possible No Internet access/ I do not know where/how to search/ I do not know which information is reliabl/ The information found is confusing/difficult to understand/ It is difficult to find clear information/ Other reasons, namely:____
4.6	Wie häufig benutzen Sie die folgenden digitalen Medien, um sich zu informieren, wenn Ihr Kind krank ist?	How often do you use digital media, when your child is sick?
		Social media	Never; rarely; sometimes; frequently; very frequently
		Webpages for parents	Never; rarely; sometimes; frequently; very frequently
		Apps	Never; rarely; sometimes; frequently; very frequently
		Search engines	Never; rarely; sometimes; frequently; very frequently
		Webpages of pediatricians or children's hospitals	Never; rarely; sometimes; frequently; very frequently
		Official webpages of health services or health organizations	Never; rarely; sometimes; frequently; very frequently
		Other information sources, namely:___	Never; rarely; sometimes; frequently; very frequently
4.7	Wenn Sie Internetseiten für Mütter/Väter/Eltern verwenden: Welche Internetseite(n) für Mütter/ Väter/ Eltern verwenden Sie, wenn Ihr Kind krank ist?	When you use Internet sites for mothers/fathers/parents: Which Internet sites do you use in general, when your child is sick?	Multiple answer possible swissmom.ch /Eltern.de/ letsfamiliy.ch/ gofeminin.de/ familienleben.ch/ rund-ums-baby.de/ wireltern.ch/ windeln.de/ netmoms.de/ liliput-lounge.de/ babycenter.de/ hallo-eltern.de/ urbia.de / baby-und-familie.de/ familie.de/ Other webpages for parents, namely:___/ I don't know how the webpages I use are called
4.8	Falls Sie Apps nutzen: Welche App(s) benutzten Sie, wenn Ihr Kind krank ist?	If you use "Apps" which apps do you use when your child is sick?	1. I use the following app: ___ 2. I use the following app: ___ 3. I use the following app: ___
4.9	Falls Sie Social Media nutzen: Auf welchen Social Media Plattformen informieren Sie sich und wie oft nutzen Sie diese Plattformen, wenn Ihr Kind krank ist?	If you use social media plattforms which apps do you use when your child is sick?
		Facebook	Never; rarely; sometimes; frequently; very frequently
		Instagram	Never; rarely; sometimes; frequently; very frequently
		Twitter	Never; rarely; sometimes; frequently; very frequently
		YouTube	Never; rarely; sometimes; frequently; very frequently
		Pinterest	Never; rarely; sometimes; frequently; very frequently
		Professional social netwroks (e.g LinedIn)	Never; rarely; sometimes; frequently; very frequently
		Other social media platforms, namely:___	Never; rarely; sometimes; frequently; very frequently
4.1	Wie verwenden Sie in den digitalen Medien die Option der Chats, Posts oder Foren, wenn Ihr Kind krank ist?	How do you use digital media options like chats, posts or foums when your child is sick?	Multiple answer possible I read chats, posts, or forums inputs of other people / I ask questions in chats, posts, or forums / I post own experiences and opinions in chats, posts, or forums/ I answer question of other parents/ I do not use chats, posts, or forums
4.11	Wie häufig informieren Sie sich in den digitalen Medien (Internet, Apps, Social Media) über die folgenden Themen in Bezug auf Kindergesundheit und Kinderentwicklung?	How often do you use digital media to inform yourself on the following topics regarding general child health and development?
	Allgemeine Informationen zur Erkrankung (Bedeutung, Dauer, Übertragbarkeit etc.)	Health information on illness/disease?	Never; rarely; sometimes; frequently; very frequently
	Alternativmedizinische Behandlungsmöglichkeiten der Erkrankungen (z.B. „Hausmittel“)	Alternative therapies?	Never; rarely; sometimes; frequently; very frequently
	Medizinische Behandlungsmöglichkeiten der Erkrankung	Medical therapuetical options?	Never; rarely; sometimes; frequently; very frequently
	Informationen zu Arzneimitteln (z.B. zu Nebenwirkungen, Verabreichung)	Information on medication (e.g. side effects, dosage,..)	Never; rarely; sometimes; frequently; very frequently
	Anderes Thema, nämlich:…	Other topic:_______________	Never; rarely; sometimes; frequently; very frequently
4.12	Ich nutze digitale Medien (Internet, Apps, Social Media), wenn mein Kind krank ist und ich Fragen habe, weil…	I use digital media (Internet, apps, social media) when I have questions regarding general child health and development for the follwoing reasons:
		24h availability of Information	Applies very much; applies; half/half; partly applies; does not apply
		Information up-to-date	Applies very much; applies; half/half; partly applies; does not apply
		Anonimity	Applies very much; applies; half/half; partly applies; does not apply
		Good personal experiences	Applies very much; applies; half/half; partly applies; does not apply
		Family or friends also use it	Applies very much; applies; half/half; partly applies; does not apply
		Allow to exchange opinions and experiences with other parents	Applies very much; applies; half/half; partly applies; does not apply
		Emotional support	Applies very much; applies; half/half; partly applies; does not apply
		Other reasons, namely:___	Applies very much; applies; half/half; partly applies; does not apply
(5) information behavior around last pediatric visit
5.1	Bitte denken Sie an die letzte akute Erkrankung oder das letzte gesundheitliche Problem Ihres Kindes zurück. Bitte geben Sie an, um welches gesundheitliche Problem es sich handelte.	Please recall the last time your child was sick or had an acute health problem. What kind of sickness or health problem was it?	Multiple answer possible Fever; cold/cough; breathing difficulties; eye discharge/red eye; skin problems/transformation; difficulty in drinking; nutritional problems; vomiting; digestive problems; reduced general condition; stomachache; sore throat; earache; unclear crying/ unclear pain; sleeping problems; seizure; allergy/food intolerance; accident/intoxication; other:___
5.2	Waren Sie wegen diesen gesundheitlichen Problemen/ Erkrankung Ihres Kindes bei einem Arzt/einer Ärztin?	Did you go see your doctor for this sickness or health problem?	Yes; no
5.3	Wenn Sie bei Ihrem Kinderarzt/Ihrer Kinderärztin deswegen waren, welche Diagnose hat Ihr Kinderarzt/Ihre Kinderärztin gestellt?	If you saw your doctor, what did he/she diagnose?	Multiple answer possible Fever; cold/cough; breathing difficulties; eye discharge/red eye; skin problems/transformation; difficulty in drinking; nutritional problems; vomiting; digestive problems; reduced general condition; stomachache; sore throat; earache; unclear crying/ unclear pain; sleeping problems; seizure; allergy/food intolerance; accident/intoxication; other:___
5.4	Haben Sie sich VOR dem Arztbesuch über die gesundheitlichen Probleme/Erkrankung Ihres Kindes mit digitalen Medien (Internet, Apps, Social Media) informiert?	Did you inform yourself prior to the doctor visit on by digital meda about the sickness/health problem?	Yes; no; don't know
5.5	Wenn Sie bei 5.4 „Ja“ oder „Weiss nicht“ geantwortet haben: Nach welchen Informationen haben Sie VOR dem Arztbesuch in digitalen Medien (Internet, Apps, Social Media) gesucht?	If "Yes" or "Do not know", for which information did you search in digital media?	Multiple answer possible General information on the health problem/illness (significance, treatment options, transmissibility, etc.); Alternative medical treatment options for illness/pain (e.g. home remedies); medical treatment options; information on drugs (e.g. side effects, administration); other, namely:___; don't know
5.6	Haben Sie sich NACH dem Arztbesuch über die gesundheitlichen Probleme/ die Erkrankung Ihres Kindes mit digitalen Medien (Internet, Apps, Social Media) informiert?	Did you inform yourself after the doctor visit on by digital meda about the sickness/health problem?	Yes; no; don't know
5.7	Wenn Sie bei 5.6 „Ja“ oder Weiss nicht“ geantwortet haben: Nach welchen Informationen haben Sie NACH dem Arztbesuch in digitalen Medien (Internet, Apps, Social Media) gesucht?	If "Yes" or "Do not know", for which information did you search in digital media?	Multiple answer possible General information on the health problem/illness (significance, treatment options, transmissibility, etc.); Alternative medical treatment options for illness/pain (e.g. home remedies); medical treatment options; information on drugs (e.g. side effects, administration); other, namely:___; don't know
5.8	Weshalb haben Sie NACH dem Arztbesuch in digitalen Medien (Internet, Apps, Social Media) nach Informationen über die gesundheitlichen Probleme/die Erkrankung Ihres Kindes gesucht?	Why did you search for information about the sickness/health problem AFTER the doctors visit?
	Ich habe zu wenig Informationen in der Arztpraxis/Klinik erhalten	I did not receive enough information from the doctor's office/clinic	Applies very much; applies; half/half; partly applies; does not apply
	Informationen von der Arztpraxis/Klinik waren nicht verständlich oder wiedersprüchlich	The information from the doctor's office/clinic was not clear or inconsistent	Applies very much; applies; half/half; partly applies; does not apply
	Ich hatte das Bedürfnis, informationen von der Arztpraxis/Klinik zu überprüfen	I felt the need to review the information received from the doctor's office/clinic	Applies very much; applies; half/half; partly applies; does not apply
	Ich hatte das Bedürfnis, mich mit anderen auszutauschen bzw. nach Erfahrungen und Tipps zu suchen	I felt the need to exchange ideas with others respectively to look for experiences and tips.	Applies very much; applies; half/half; partly applies; does not apply
	Ich habe nach anderen Therapiemöglichkeiten gesucht	I have been looking for other therapy options	Applies very much; applies; half/half; partly applies; does not apply
5.9	Wenn Sie nicht beim Kinderarzt/bei der Kinderärztin waren: Haben Sie wegen den gesundheitlichen Problemen/ der Erkrankung Ihres Kindes Informationen in digitalen Medien (Internet, Apps, Social Media) gesucht?	If you didn't go to the doctor: Did you inform yourself after the doctor visit on by digital meda about the sickness/health problem?	Yes; no; don't know
5.1	Wenn Sie bei 5.9 „Ja“ oder „Weiss nicht“ geantwortet haben: Nach welchen Informationen haben Sie in digitalen Medien (Internet, Apps, Social Media) gesucht?	If "Yes" or "Do not know", for which information did you search in digital media?	Multiple answer possible General information on the health problem/illness (significance, treatment options, transmissibility, etc.); Alternative medical treatment options for illness/pain (e.g. home remedies); medical treatment options; information on drugs (e.g. side effects, administration); other, namely:___; don't know
(6) e-health literacy of survey participant, attitude towards online health information and participants' frequency of search for online health-related information
6	Dieser Abschnitt handelt davon, wie sicher Sie sich fühlen, mit digitalen Medien nach gesundheitliche Informationen zu suchen und diese Informationen bewerten.	This section is about how confident you feel about using digital media to search for and evaluate health information.
		I know what health resources are available on the Internet	Strongly disagree; disagree; undecided; agree; strongly agree
		I know where to find helpful health resources on the Internet	Strongly disagree; disagree; undecided; agree; strongly agree
		I know how to find helpful health resources on the Internet	Strongly disagree; disagree; undecided; agree; strongly agree
		I know how to use the Internet to answer my questions about health	Strongly disagree; disagree; undecided; agree; strongly agree
		I know how to use the health information I find on the Internet to help me	Strongly disagree; disagree; undecided; agree; strongly agree
		I have the skills I need to evaluate the health resources I find on the Internet	Strongly disagree; disagree; undecided; agree; strongly agree
		I can tell high quality health resources from low quality health resources on the Internet	Strongly disagree; disagree; undecided; agree; strongly agree
		I feel confident in using information from the Internet to make health decisions	Strongly disagree; disagree; undecided; agree; strongly agree
6.1	Bitte geben Sie an, ob Sie der folgenden Aussage voll und ganz zustimmen, eher zustimmen, eher nicht zustimmen oder überhaupt nicht zustimmen: „Das Internet ist eine gute Quelle, um meine Kenntnisse über gesundheitsbezogene Themen zu verbessern.“	Please indicate for each of the following statements if you strongly agree, are undecided, disagree or strongly disagree. "The Internet is a good resource to improve my konwledge on health related topics."	Completely agree; rather agree; rather disagree; completely disagree; don't know/no indication
6.2		How often do you believe that the information is correct?	Always; sometimes; never
		Do you try and find out if a site is reliable before accepting or using the information?	Always; sometimes; never
		How often are you sure you understand what you find on the Internet?	Always; sometimes; never
6.3	Möchten Sie gerne, dass Ihr Kinderarzt/Ihre Kinderärztin Ihnen vertrauenswürdige Internetquellen angibt?	Would you like your pediatrician to recommend you trustworthy Internet sources?	Yes; no; don't know
(7) Health status of survey participant
7.1	Wie ist Ihr Gesundheitszustand im Allgemeinen? Ist er…	How is your health condition in general?	Very good; good; moderate; bad; very bad
7.2	Haben Sie in den letzten 12 Monaten das Internet genutzt, um nach gesundheitsbezogenen Informationen zu suchen?	Did you use the Internet to search for health related Information?	Yes, once a week or more; yes, several times a month; yes, approximately once a month; yes, approximately once every two months; yes, a few times in the last year
